# Supplementary material
Source: PubMed Central journal article supplement (PMC1072485)
Supplement: pnas_102_13_4801__2.pdf [file pnas_102_13_4801__2.pdf]

**Table 4. Probe sets whose expression is increased in T cell- and monocyte-enriched populations versus total leukocytes**

100 probe sets whose apparent expression most increased in T cells relative to Buffy coat

| Fold change in T cells | Probe set   | Gene description                                                       | Defined gene lists                                          |
|------------------------|-------------|------------------------------------------------------------------------|-------------------------------------------------------------|
| 6.81                   | 209795_at   | CD69 antigen (p60, early T cell activation antigen)                    | cell_cycle, cell_signaling, immunology                      |
| 5.59                   | 206363_at   | v-maf musculoaponeurotic fibrosarcoma oncogene homolog (avian)         | tsonc                                                       |
| 4.80                   | 212538_at   | dedicator of cytokinesis 9                                             |                                                             |
| 4.72                   | 210948_s_at | lymphoid enhancer-binding factor 1                                     | development                                                 |
| 4.71                   | 220418_at   | ubiquitin associated and SH3 domain containing, A                      |                                                             |
| 4.58                   | 218911_at   | glioma-amplified sequence-41                                           |                                                             |
| 4.56                   | 206545_at   | CD28 antigen (Tp44)                                                    |                                                             |
| 4.43                   | 204777_s_at | mal, T cell differentiation protein                                    | immunology, misc                                            |
| 4.25                   | 219528_s_at | B-cell CLL/lymphoma 11B (zinc finger protein)                          |                                                             |
| 4.22                   | 221974_at   | mRNA; cDNA DKFZp686M12165 (from clone DKFZp686M12165)                  |                                                             |
| 4.21                   | 211005_at   | linker for activation of T cells                                       |                                                             |
| 4.20                   | 206150_at   | tumor necrosis factor receptor superfamily, member 7                   | immunology                                                  |
| 4.19                   | 205006_s_at | N-myristoyltransferase 2                                               |                                                             |
| 4.18                   | 209602_s_at | GATA binding protein 3                                                 | gene_regulation, immunology, misc, transcription            |
| 4.11                   | 204019_s_at | SH3 domain containing, Ysc84-like 1 (S. cerevisiae)                    |                                                             |
| 4.07                   | 204890_s_at | lymphocyte-specific protein tyrosine kinase                            | immunology, signal_transduction, tsonc                      |
| 4.07                   | 205005_s_at | N-myristoyltransferase 2                                               |                                                             |
| 4.05                   | 202431_s_at | v-myc myelocytomatosis viral oncogene homolog (avian)                  | gene_regulation, immunology, transcription, tsonc           |
| 4.03                   | 203413_at   | NEL-like 2 (chicken)                                                   |                                                             |
| 3.97                   | 210607_at   | fms-related tyrosine kinase 3 ligand                                   | cell_cycle, cell_signaling, immunology, signal_transduction |
| 3.91                   | 204773_at   | interleukin 11 receptor, alpha                                         | immunology                                                  |
| 3.87                   | 213460_x_at | Williams Beuren syndrome chromosome region 20C                         |                                                             |
| 3.83                   | 219346_at   | leucine rich repeat and fibronectin type III domain containing 3       |                                                             |
| 3.81                   | 206804_at   | CD3G antigen, gamma polypeptide (TiT3 complex)                         | immunology                                                  |
| 3.81                   | 203717_at   | dipeptidylpeptidase 4 (CD26, adenosine deaminase complexing protein 2) | angiogenesis, immunology, metastasis                        |
| 3.81                   | 216945_x_at | PAS domain containing serine/threonine kinase                          |                                                             |
| 3.80                   | 39248_at    | aquaporin 3                                                            |                                                             |
| 3.80                   | 203386_at   | TBC1 domain family, member 4                                           |                                                             |
| 3.77                   | 210425_x_at | golgin-67                                                              |                                                             |
| 3.74                   | 211596_s_at | leucine-rich repeats and immunoglobulin-like domains 1                 |                                                             |
| 3.73                   | 64432_at    | apoptosis-related protein PNAS-1                                       |                                                             |
| 3.70                   | 213539_at   | CD3D antigen, delta polypeptide (TiT3 complex)                         |                                                             |
| 3.70                   | 213670_x_at | Williams Beuren syndrome chromosome region 20C                         |                                                             |

| Fold change in T cells | Probe set   | Gene description                                                                  | Defined gene lists                                            |
|------------------------|-------------|-----------------------------------------------------------------------------------|---------------------------------------------------------------|
| 3.70                   | 217147_s_at | T cell receptor interacting molecule                                              |                                                               |
| 3.68                   | 210972_x_at | cDNA clone MGC:71411 IMAGE:4853814, complete cds                                  |                                                               |
| 3.67                   | 211727_s_at | COX11 homolog, cytochrome c oxidase assembly protein (yeast)                      | misc                                                          |
| 3.64                   | 221648_s_at | CGI-146 protein                                                                   |                                                               |
| 3.62                   | 219029_at   | Hypothetical protein FLJ21657                                                     |                                                               |
| 3.61                   | 201848_s_at | BCL2/adenovirus E1B 19kDa interacting protein 3                                   | apoptosis                                                     |
| 3.60                   | 39729_at    | peroxiredoxin 2                                                                   |                                                               |
| 3.60                   | 222266_at   | Chromosome 19 open reading frame 2                                                |                                                               |
| 3.59                   | 201656_at   | integrin, alpha 6                                                                 | cell_signaling, immunology, metastasis                        |
| 3.59                   | 206492_at   | fragile histidine triad gene                                                      | tsonc                                                         |
| 3.58                   | 209671_x_at | T cell receptor alpha locus                                                       |                                                               |
| 3.57                   | 208798_x_at | golgin-67                                                                         |                                                               |
| 3.56                   | 206666_at   | granzyme K (serine protease, granzyme 3; tryptase II)                             | misc                                                          |
| 3.55                   | 214093_s_at | nexilin (F actin binding protein)                                                 |                                                               |
| 3.52                   | 214723_x_at | KIAA1641 protein                                                                  |                                                               |
| 3.52                   | 202969_at   | dual-specificity tyrosine-(Y)-phosphorylation regulated kinase 2                  | signal_transduction                                           |
| 3.50                   | 220132_s_at | lectin-like NK cell receptor                                                      |                                                               |
| 3.50                   | 209267_s_at | solute carrier family 39 (zinc transporter), member 8                             |                                                               |
| 3.49                   | 207651_at   | platelet activating receptor homolog                                              |                                                               |
| 3.47                   | 206761_at   | CD96 antigen                                                                      |                                                               |
| 3.42                   | 209348_s_at | v-maf musculoaponeurotic fibrosarcoma oncogene homolog (avian)                    | tsonc                                                         |
| 3.41                   | 218532_s_at | hypothetical protein FLJ20152                                                     |                                                               |
| 3.40                   | 219315_s_at | hypothetical protein FLJ20898                                                     |                                                               |
| 3.39                   | 200965_s_at | actin binding LIM protein 1                                                       |                                                               |
| 3.37                   | 205407_at   | reversion-inducing-cysteine-rich protein with kazal motifs                        |                                                               |
| 3.37                   | 217340_at   | ribosomal protein L21                                                             |                                                               |
| 3.36                   | 213457_at   | malignant fibrous histiocytoma amplified sequence 1                               |                                                               |
| 3.36                   | 217838_s_at | Enah/Vasp-like                                                                    |                                                               |
| 3.34                   | 205831_at   | CD2 antigen (p50), sheep red blood cell receptor                                  | angiogenesis, immunology, metastasis                          |
| 3.32                   | 203608_at   | aldehyde dehydrogenase 5 family, member A1 (succinate-semialdehyde dehydrogenase) |                                                               |
| 3.31                   | 213093_at   | protein kinase C, alpha                                                           | angiogenesis, cell_cycle, cell_signaling, signal_transduction |
| 3.30                   | 213958_at   | CD6 antigen                                                                       | immunology                                                    |
| 3.28                   | 211902_x_at |                                                                                   |                                                               |
| 3.28                   | 219109_at   | PF20                                                                              |                                                               |
| 3.28                   | 213166_x_at | hypothetical protein FLJ14346                                                     |                                                               |
| 3.27                   | 203685_at   | B-cell CLL/lymphoma 2                                                             | apoptosis, immunology, tsonc                                  |
| 3.25                   | 205047_s_at | asparagine synthetase                                                             | immunology                                                    |
| 3.24                   | 214130_s_at | phosphodiesterase 4D interacting protein (myomegalin)                             |                                                               |
| 3.24                   | 218723_s_at | response gene to complement 32                                                    |                                                               |
| 3.22                   | 212846_at   | KIAA0179                                                                          |                                                               |
| 3.22                   | 204142_at   | rTS beta protein                                                                  |                                                               |

| Fold change in T cells | Probe set   | Gene description                                                                            | Defined gene lists                               |
|------------------------|-------------|---------------------------------------------------------------------------------------------|--------------------------------------------------|
| 3.21                   | 211796_s_at | T cell receptor beta chain BV20S1 BJ1-5 BC1 mRNA, complete cds                              |                                                  |
| 3.21                   | 205510_s_at | hypothetical protein FLJ10038                                                               |                                                  |
| 3.20                   | 212400_at   | hypothetical protein MGC50853                                                               |                                                  |
| 3.20                   | 202971_s_at | dual-specificity tyrosine-(Y)-phosphorylation regulated kinase 2                            | signal_transduction                              |
| 3.20                   | 217394_at   | Human TCRAV8.1a mRNA for T cell receptor alpha-chain V region, partial cds.                 |                                                  |
| 3.17                   | 213598_at   | putative dimethyladenosine transferase                                                      |                                                  |
| 3.17                   | 212614_at   | AT rich interactive domain 5B (MRF1-like)                                                   |                                                  |
| 3.16                   | 203828_s_at | natural killer cell transcript 4                                                            |                                                  |
| 3.16                   | 202165_at   | protein phosphatase 1, regulatory (inhibitor) subunit 2                                     |                                                  |
| 3.16                   | 219864_s_at | Down syndrome critical region gene 1-like 2 /// Down syndrome critical region gene 1-like 2 |                                                  |
| 3.15                   | 209657_s_at | heat shock transcription factor 2                                                           |                                                  |
| 3.15                   | 214705_at   | InaD-like protein                                                                           |                                                  |
| 3.15                   | 217950_at   | nitric oxide synthase interacting protein                                                   |                                                  |
| 3.14                   | 204891_s_at | lymphocyte-specific protein tyrosine kinase /// lymphocyte-specific protein tyrosine kinase | immunology, signal_transduction, tsonc           |
| 3.14                   | 205087_at   | RWD domain containing 3                                                                     |                                                  |
| 3.14                   | 211675_s_at | I-mfa domain-containing protein                                                             |                                                  |
| 3.12                   | 202073_at   | Optineurin                                                                                  |                                                  |
| 3.12                   | 219117_s_at | FK506 binding protein 11, 19 kDa                                                            |                                                  |
| 3.12                   | 205288_at   | CDC14 cell division cycle 14 homolog A (S. cerevisiae)                                      |                                                  |
| 3.12                   | 202746_at   | integral membrane protein 2A                                                                |                                                  |
| 3.11                   | 205254_x_at | transcription factor 7 (T cell specific, HMG-box)                                           | gene_regulation, immunology, transcription       |
| 3.10                   | 201853_s_at | cell division cycle 25B                                                                     |                                                  |
| 3.08                   | 209604_s_at | GATA binding protein 3                                                                      | gene_regulation, immunology, misc, transcription |
| 3.07                   | 217326_x_at |                                                                                             |                                                  |
| 3.07                   | 202478_at   | tribbles homolog 2 (Drosophila)                                                             |                                                  |
| 3.06                   | 211478_s_at | dipeptidylpeptidase 4 (CD26, adenosine deaminase complexing protein 2)                      | angiogenesis, immunology, metastasis             |

### 100 Probe Sets Whose Apparent Expression Most Increased in Monocytes Relative to Buffy Coat

| Fold change in monocytes | Probe set   | Gene description                                                                       | Defined gene lists                        |
|--------------------------|-------------|----------------------------------------------------------------------------------------|-------------------------------------------|
| 8.31                     | 203821_at   | diphtheria toxin receptor (heparin-binding epidermal growth factor-like growth factor) | immunology                                |
| 5.86                     | 210895_s_at | CD86 antigen (CD28 antigen ligand 2, B7-2 antigen)                                     | immunology                                |
| 5.85                     | 202393_s_at | TGFB inducible early growth response                                                   | angiogenesis, cell_cycle, cell_signaling, |

| Fold change in monocytes | Probe set   | Gene description                                                           | Defined gene lists                                   |
|--------------------------|-------------|----------------------------------------------------------------------------|------------------------------------------------------|
|                          |             |                                                                            | immunology, misc                                     |
| 5.83                     | 201110_s_at | thrombospondin 1                                                           | angiogenesis, cell_signaling, immunology, metastasis |
| 5.83                     | 221841_s_at | Kruppel-like factor 4 (gut)                                                |                                                      |
| 5.57                     | 202284_s_at | cyclin-dependent kinase inhibitor 1A (p21, Cip1)                           | immunology, tsonc                                    |
| 5.47                     | 203645_s_at | CD163 antigen                                                              |                                                      |
| 5.40                     | 208450_at   | lectin, galactoside-binding, soluble, 2 (galectin 2)                       |                                                      |
| 5.23                     | 217388_s_at | kynureninase (L-kynurenine hydrolase)                                      |                                                      |
| 5.20                     | 212681_at   | erythrocyte membrane protein band 4.1-like 3                               |                                                      |
| 5.16                     | 212224_at   | aldehyde dehydrogenase 1 family, member A1                                 |                                                      |
| 5.16                     | 219093_at   | hypothetical protein FLJ20701                                              |                                                      |
| 5.06                     | 215646_s_at | chondroitin sulfate proteoglycan 2 (versican)                              | immunology                                           |
| 5.03                     | 215049_x_at | CD163 antigen                                                              |                                                      |
| 4.89                     | 208923_at   | cytoplasmic FMR1 interacting protein 1                                     |                                                      |
| 4.73                     | 213397_x_at | ribonuclease, RNase A family, 4                                            |                                                      |
| 4.68                     | 220146_at   | toll-like receptor 7                                                       |                                                      |
| 4.67                     | 217897_at   | FXYD domain containing ion transport regulator 6                           |                                                      |
| 4.50                     | 211571_s_at | chondroitin sulfate proteoglycan 2 (versican)                              | immunology                                           |
| 4.49                     | 206743_s_at | asialoglycoprotein receptor 1                                              |                                                      |
| 4.48                     | 204112_s_at | histamine N-methyltransferase                                              |                                                      |
| 4.48                     | 211776_s_at | erythrocyte membrane protein band 4.1-like 3                               |                                                      |
| 4.39                     | 202436_s_at | cytochrome P450, family 1, subfamily B, polypeptide 1                      | immunology, pharmacology                             |
| 4.39                     | 220162_s_at | caspase recruitment domain family, member 9                                |                                                      |
| 4.38                     | 201506_at   | transforming growth factor, beta-induced, 68kDa                            | cell_cycle, cell_signaling, immunology               |
| 4.38                     | 212956_at   | KIAA0882 protein                                                           |                                                      |
| 4.38                     | 206710_s_at | erythrocyte membrane protein band 4.1-like 3                               |                                                      |
| 4.34                     | 49306_at    | Ras association (RalGDS/AF-6) domain family 4                              |                                                      |
| 4.28                     | 206157_at   | pentaxin-related gene, rapidly induced by IL-1 beta                        | cell_cycle, cell_signaling, immunology               |
| 4.28                     | 202435_s_at | cytochrome P450, family 1, subfamily B, polypeptide 1                      | immunology, pharmacology                             |
| 4.20                     | 217513_at   | hypothetical protein LOC284021                                             |                                                      |
| 4.19                     | 218559_s_at | v-maf musculoaponeurotic fibrosarcoma oncogene homolog B (avian)           |                                                      |
| 4.18                     | 209684_at   | Ras and Rab interactor 2                                                   |                                                      |
| 4.16                     | 208146_s_at | carboxypeptidase, vitellogenic-like                                        |                                                      |
| 4.15                     | 203485_at   | reticulon 1                                                                | angiogenesis, metastasis                             |
| 4.14                     | 203922_s_at | cytochrome b-245, beta polypeptide (chronic granulomatous disease)         | immunology                                           |
| 4.14                     | 201105_at   | lectin, galactoside-binding, soluble, 1 (galectin 1)                       | immunology, misc                                     |
| 4.13                     | 202437_s_at | cytochrome P450, family 1, subfamily B, polypeptide 1                      | immunology, pharmacology                             |
| 4.10                     | 208890_s_at | plexin B2                                                                  |                                                      |
| 4.09                     | 205859_at   | lymphocyte antigen 86                                                      |                                                      |
| 4.04                     | 200602_at   | amyloid beta (A4) precursor protein (protease nexin-II, Alzheimer disease) | immunology                                           |
| 4.01                     | 203932_at   | major histocompatibility complex, class II, DM beta                        | immunology                                           |
| 4.00                     | 202007_at   | nidogen (enactin)                                                          |                                                      |
| 3.99                     | 212460_at   | chromosome 14 open reading frame 147                                       |                                                      |

| <b>Fold change in monocytes</b> | <b>Probe set</b> | <b>Gene description</b>                                                    | <b>Defined gene lists</b>                  |
|---------------------------------|------------------|----------------------------------------------------------------------------|--------------------------------------------|
| 3.99                            | 201417_at        | SRY (sex determining region Y)-box 4                                       | gene_regulation, immunology, transcription |
| 3.99                            | 205076_s_at      | cisplatin resistance associated                                            |                                            |
| 3.99                            | 219666_at        | membrane-spanning 4-domains, subfamily A, member 6A                        |                                            |
| 3.98                            | 221802_s_at      | KIAA1598                                                                   |                                            |
| 3.96                            | 213537_at        | major histocompatibility complex, class II, DP alpha 1                     | immunology                                 |
| 3.94                            | 200736_s_at      | glutathione peroxidase 1                                                   | immunology, pharmacology                   |
| 3.92                            | 205789_at        | CD1D antigen, d polypeptide                                                | angiogenesis, metastasis                   |
| 3.85                            | 206488_s_at      | CD36 antigen (collagen type I receptor, thrombospondin receptor)           | immunology                                 |
| 3.84                            | 204466_s_at      | synuclein, alpha (non A4 component of amyloid precursor)                   |                                            |
| 3.82                            | 204115_at        | guanine nucleotide binding protein (G protein), gamma 11                   |                                            |
| 3.78                            | 208949_s_at      | lectin, galactoside-binding, soluble, 3 (galectin 3)                       | immunology                                 |
| 3.75                            | 201560_at        | chloride intracellular channel 4                                           |                                            |
| 3.73                            | 205992_s_at      | interleukin 15                                                             | immunology                                 |
| 3.69                            | 203305_at        | coagulation factor XIII, A1 polypeptide                                    | immunology                                 |
| 3.68                            | 203923_s_at      | cytochrome b-245, beta polypeptide (chronic granulomatous disease)         | immunology                                 |
| 3.66                            | 217853_at        | tensin-like SH2 domain containing 1                                        |                                            |
| 3.66                            | 208894_at        | major histocompatibility complex, class II, DR alpha                       | immunology                                 |
| 3.64                            | 214953_s_at      | amyloid beta (A4) precursor protein (protease nexin-II, Alzheimer disease) | immunology                                 |
| 3.63                            | 211732_x_at      | histamine N-methyltransferase                                              |                                            |
| 3.63                            | 209499_x_at      | tumor necrosis factor (ligand) superfamily, member 13                      |                                            |
| 3.63                            | 203300_x_at      | adaptor-related protein complex 1, sigma 2 subunit                         |                                            |
| 3.62                            | 202295_s_at      | cathepsin H                                                                |                                            |
| 3.61                            | 204081_at        | neurogranin (protein kinase C substrate, RC3)                              |                                            |
| 3.61                            | 220091_at        | solute carrier family 2 (facilitated glucose transporter), member 6        |                                            |
| 3.60                            | 210220_at        | frizzled homolog 2 (Drosophila)                                            | development                                |
| 3.59                            | 213624_at        | Sphingomyelin phosphodiesterase, acid-like 3A                              |                                            |
| 3.58                            | 210222_s_at      | reticulon 1                                                                | angiogenesis, metastasis                   |
| 3.56                            | 201743_at        | CD14 antigen                                                               | angiogenesis, immunology, metastasis, misc |
| 3.54                            | 201847_at        | lipase A, lysosomal acid, cholesterol esterase (Wolman disease)            |                                            |
| 3.54                            | 201416_at        | SRY (sex determining region Y)-box 4                                       | gene_regulation, immunology, transcription |
| 3.53                            | 202944_at        | N-acetylgalactosaminidase, alpha-                                          | immunology                                 |
| 3.53                            | 202381_at        | a disintegrin and metalloproteinase domain 9 (meltrin gamma)               |                                            |
| 3.51                            | 206978_at        | chemokine (C-C motif) receptor 2                                           | immunology                                 |
| 3.51                            | 219806_s_at      | FN5 protein                                                                |                                            |
| 3.49                            | 210314_x_at      | tumor necrosis factor (ligand) superfamily, member 13                      |                                            |
| 3.48                            | 201425_at        | aldehyde dehydrogenase 2 family (mitochondrial)                            | immunology, pharmacology                   |
| 3.47                            | 201590_x_at      | annexin A2                                                                 |                                            |
| 3.46                            | 200762_at        | dihydropyrimidinase-like 2                                                 |                                            |
| 3.46                            | 200838_at        | cathepsin B                                                                | immunology, misc                           |
| 3.44                            | 208818_s_at      | catechol-O-methyltransferase                                               | behavior, immunology                       |

| <b>Fold change in monocytes</b> | <b>Probe set</b> | <b>Gene description</b>                                       | <b>Defined gene lists</b> |
|---------------------------------|------------------|---------------------------------------------------------------|---------------------------|
| 3.40                            | 205730_s_at      | actin binding LIM protein family, member 3                    |                           |
| 3.39                            | 221042_s_at      | calmin (calponin-like, transmembrane)                         |                           |
| 3.38                            | 212235_at        | plexin D1                                                     |                           |
| 3.37                            | 205686_s_at      | CD86 antigen (CD28 antigen ligand 2, B7-2 antigen)            | immunology                |
| 3.36                            | 213379_at        | hypothetical protein CL640                                    |                           |
| 3.35                            | 210982_s_at      | major histocompatibility complex, class II, DR alpha          | immunology                |
| 3.35                            | 202201_at        | biliverdin reductase B (flavin reductase (NADPH))             |                           |
| 3.33                            | 200839_s_at      | cathepsin B                                                   | immunology, misc          |
| 3.32                            | 205685_at        | CD86 antigen (CD28 antigen ligand 2, B7-2 antigen)            | immunology                |
| 3.31                            | 208816_x_at      | annexin A2 pseudogene 1                                       |                           |
| 3.30                            | 214146_s_at      | pro-platelet basic protein (chemokine (C-X-C motif) ligand 7) | immunology                |
| 3.30                            | 211369_at        | calcium binding protein P22                                   |                           |
| 3.30                            | 209696_at        | fructose-1,6-bisphosphatase 1                                 | immunology                |
| 3.30                            | 206120_at        | CD33 antigen (gp67)                                           | angiogenesis, metastasis  |
| 3.29                            | 204526_s_at      | TBC1 domain family, member 8 (with GRAM domain)               |                           |
| 3.27                            | 220016_at        | hypothetical protein MGC5395                                  |                           |
