# Supplementary material
Source: PubMed Central journal article supplement (PMC1072485)
Supplement: pnas_102_13_4801__4.pdf [file pnas_102_13_4801__4.pdf]

**Table 6. Probe sets whose apparent expression is most increased and decreased in trauma subjects**

100 probe sets whose apparent expression most increased in trauma subjects

| Fold change in trauma | Probe set   | Gene Description                                                                       | Defined gene lists       |
|-----------------------|-------------|----------------------------------------------------------------------------------------|--------------------------|
| 28.44                 | 206697_s_at | haptoglobin                                                                            | immunology, misc         |
| 25.18                 | 202018_s_at | Lactotransferrin                                                                       | immunology               |
| 21.31                 | 219669_at   | polycythemia rubra vera 1                                                              |                          |
| 17.81                 | 212531_at   | lipocalin 2 (oncogene 24p3)                                                            | immunology, tsonc        |
| 14.03                 | 208470_s_at | Haptoglobin                                                                            | immunology, misc         |
| 13.20                 | 206177_s_at | Arginase                                                                               |                          |
| 13.12                 | 207269_at   | defensin, alpha 4, corticostatin                                                       | immunology               |
| 11.35                 | 206676_at   | carcinoembryonic antigen-related cell adhesion molecule 8                              |                          |
| 11.22                 | 207329_at   | matrix metalloproteinase 8 (neutrophil collagenase)                                    | immunology, misc         |
| 10.17                 | 205844_at   | vanin 1                                                                                |                          |
| 9.46                  | 203948_s_at | Myeloperoxidase                                                                        | immunology, misc         |
| 9.39                  | 205557_at   | bactericidal/permeability-increasing protein                                           | immunology, misc         |
| 8.91                  | 209369_at   | annexin A3                                                                             |                          |
| 8.12                  | 219975_x_at | thioesterase domain containing 1                                                       |                          |
| 8.01                  | 205033_s_at | defensin, alpha 1, myeloid-related sequence                                            | immunology, misc         |
| 7.28                  | 206871_at   | elastase 2, neutrophil                                                                 | immunology               |
| 6.79                  | 214575_s_at | azurocidin 1 (cationic antimicrobial protein 37)                                       | immunology               |
| 6.64                  | 219607_s_at | membrane-spanning 4-domains, subfamily A, member 4                                     |                          |
| 6.62                  | 207384_at   | peptidoglycan recognition protein 1                                                    |                          |
| 6.62                  | 203936_s_at | matrix metalloproteinase 9 (gelatinase B, 92kDa gelatinase, 92kDa type IV collagenase) | angiogenesis, immunology |
| 6.55                  | 201554_x_at | Glycogenin                                                                             |                          |
| 6.12                  | 210244_at   | cathelicidin antimicrobial peptide                                                     | immunology               |
| 5.79                  | 206494_s_at | integrin, alpha 2b (platelet glycoprotein IIb of IIb/IIIa complex, antigen CD41B)      | immunology               |
| 5.73                  | 205936_s_at | hexokinase 3 (white cell)                                                              | immunology, metabolism   |
| 5.66                  | 207529_at   | defensin, alpha 5, Paneth cell-specific                                                | immunology               |
| 5.54                  | 211275_s_at | glycogenin                                                                             |                          |
| 5.07                  | 208650_s_at | CD24 antigen                                                                           |                          |
| 5.01                  | 203234_at   | uridine phosphorylase 1                                                                |                          |
| 4.89                  | 212062_at   | ATPase, Class II, type 9A                                                              |                          |
| 4.81                  | 216950_s_at | Fc fragment of IgG, high affinity Ia, receptor for (CD64)                              | immunology               |
| 4.69                  | 266_s_at    | CD24 antigen                                                                           |                          |
| 4.62                  | 205471_s_at | dachshund homolog 1 (Drosophila)                                                       |                          |
| 4.60                  | 203725_at   | growth arrest and DNA-damage-inducible, alpha                                          |                          |

| <b>Fold change in trauma</b> | <b>Probe set</b> | <b>Gene Description</b>                                                                       | <b>Defined gene lists</b>              |
|------------------------------|------------------|-----------------------------------------------------------------------------------------------|----------------------------------------|
| 4.54                         | 208651_x_at      | CD24 antigen                                                                                  |                                        |
| 4.50                         | 205513_at        | transcobalamin I (vitamin B12 binding protein, R binder family)                               | immunology                             |
| 4.42                         | 206244_at        | complement component (3b/4b) receptor 1                                                       | immunology                             |
| 4.33                         | 211548_s_at      | hydroxyprostaglandin dehydrogenase 15-(NAD)                                                   |                                        |
| 4.33                         | 201060_x_at      | Stomatin                                                                                      |                                        |
| 4.32                         | 216379_x_at      |                                                                                               |                                        |
| 4.23                         | 212090_at        | glutamate receptor, ionotropic, N-methyl D-aspartate-associated protein 1 (glutamate binding) |                                        |
| 4.21                         | 209906_at        | complement component 3a receptor 1                                                            | immunology                             |
| 4.20                         | 221765_at        | UDP-glucose ceramide glucosyltransferase                                                      |                                        |
| 4.20                         | 206618_at        | interleukin 18 receptor 1                                                                     | immunology                             |
| 4.17                         | 202446_s_at      | phospholipid scramblase 1                                                                     |                                        |
| 4.07                         | 206209_s_at      | carbonic anhydrase IV                                                                         |                                        |
| 4.04                         | 210449_x_at      | mitogen-activated protein kinase 14                                                           |                                        |
| 4.03                         | 213926_s_at      | HIV-1 Rev binding protein                                                                     |                                        |
| 4.02                         | 209771_x_at      | CD24 antigen                                                                                  |                                        |
| 4.02                         | 206493_at        | integrin, alpha 2b (platelet glycoprotein IIb of IIb/IIIa complex, antigen CD41B)             | immunology                             |
| 4.01                         | 211087_x_at      | mitogen-activated protein kinase 14                                                           |                                        |
| 4.00                         | 207674_at        | Fc fragment of IgA, receptor for                                                              | immunology                             |
| 3.96                         | 215783_s_at      | alkaline phosphatase                                                                          | cell_cycle, cell_signaling, immunology |
| 3.86                         | 201061_s_at      | stomatin                                                                                      |                                        |
| 3.85                         | 211561_x_at      | mitogen-activated protein kinase 14                                                           |                                        |
| 3.85                         | 204860_s_at      | baculoviral IAP repeat-containing 1                                                           |                                        |
| 3.84                         | 209409_at        | growth factor receptor-bound protein 10                                                       | immunology                             |
| 3.84                         | 206157_at        | pentaxin-related gene, rapidly induced by IL-1 beta                                           | cell_cycle, cell_signaling, immunology |
| 3.83                         | 208791_at        | clusterin                                                                                     | immunology                             |
| 3.82                         | 202464_s_at      | 6-phosphofructo-2-kinase/fructose-2,6-biphosphatase 3                                         |                                        |
| 3.81                         | 206208_at        | carbonic anhydrase IV                                                                         |                                        |
| 3.78                         | 204881_s_at      | UDP-glucose ceramide glucosyltransferase                                                      |                                        |
| 3.74                         | 210166_at        | toll-like receptor 5                                                                          | immunology                             |
| 3.68                         | 205863_at        | S100 calcium binding protein A12 (calgranulin C)                                              |                                        |
| 3.67                         | 217826_s_at      | ubiquitin-conjugating enzyme E2, J1 (UBC6 homolog, yeast)                                     |                                        |
| 3.66                         | 214909_s_at      | dimethylarginine dimethylaminohydrolase 2                                                     |                                        |
| 3.62                         | 206111_at        | ribonuclease, RNase A family, 2 (liver, eosinophil-derived neurotoxin)                        |                                        |
| 3.62                         | 204714_s_at      | coagulation factor V (proaccelerin, labile factor)                                            | immunology, misc                       |
| 3.62                         | 213817_at        | MRNA; cDNA DKFZp586B0220 (from clone                                                          |                                        |

| Fold change in trauma | Probe set   | Gene Description                                                                | Defined gene lists                            |
|-----------------------|-------------|---------------------------------------------------------------------------------|-----------------------------------------------|
|                       |             | DKFZp586B0220)                                                                  |                                               |
| 3.61                  | 202435_s_at | cytochrome P450, family 1, subfamily B, polypeptide 1                           | immunology, pharmacology                      |
| 3.58                  | 217552_x_at | complement component (3b/4b) receptor 1                                         | immunology                                    |
| 3.53                  | 211372_s_at | interleukin 1 receptor, type II                                                 | immunology                                    |
| 3.52                  | 202436_s_at | cytochrome P450, family 1, subfamily B, polypeptide 1                           | immunology, pharmacology                      |
| 3.51                  | 214511_x_at | Fc fragment of IgG, high affinity Ia, receptor for (CD64)                       | immunology                                    |
| 3.51                  | 210583_at   | polymerase (DNA-directed), delta interacting protein 3                          |                                               |
| 3.51                  | 204713_s_at | coagulation factor V (proaccelerin, labile factor)                              | immunology, misc                              |
| 3.51                  | 209930_s_at | nuclear factor (erythroid-derived 2), 45kDa ///                                 | gene_regulation,<br>immunology, transcription |
| 3.48                  | 203276_at   | lamin B1                                                                        |                                               |
| 3.43                  | 204861_s_at | baculoviral IAP repeat-containing 1                                             |                                               |
| 3.42                  | 212443_at   | KIAA0540 protein                                                                |                                               |
| 3.41                  | 202381_at   | A disintegrin and metalloproteinase domain 9 (meltrin gamma)                    |                                               |
| 3.39                  | 200983_x_at | CD59 antigen p18-20                                                             | angiogenesis, immunology,<br>metastasis       |
| 3.38                  | 202430_s_at | phospholipid scramblase 1                                                       |                                               |
| 3.33                  | 202437_s_at | cytochrome P450, family 1, subfamily B, polypeptide 1                           | immunology, pharmacology                      |
| 3.28                  | 206359_at   | suppressor of cytokine signaling 3                                              |                                               |
| 3.26                  | 200998_s_at | cytoskeleton-associated protein 4                                               |                                               |
| 3.24                  | 201058_s_at | myosin, light polypeptide 9, regulatory                                         |                                               |
| 3.20                  | 202990_at   | phosphorylase, glycogen; liver (Hers disease, glycogen storage disease type VI) |                                               |
| 3.19                  | 202096_s_at | benzodiazapine receptor (peripheral)                                            |                                               |
| 3.17                  | 217763_s_at | RAB31, member RAS oncogene family                                               |                                               |
| 3.13                  | 202874_s_at | ATPase, H+ transporting, lysosomal 42kDa, V1 subunit C, isoform 1               |                                               |
| 3.11                  | 220034_at   | interleukin-1 receptor-associated kinase 3                                      |                                               |
| 3.10                  | 218092_s_at | HIV-1 Rev binding protein /// HIV-1 Rev binding protein                         |                                               |
| 3.09                  | 215646_s_at | chondroitin sulfate proteoglycan 2 (versican)                                   | immunology                                    |
| 3.07                  | 211413_s_at | peptidyl arginine deiminase, type IV                                            |                                               |
| 3.04                  | 210254_at   | membrane-spanning 4-domains, subfamily A, member 3                              |                                               |
| 3.03                  | 222025_s_at | 5-oxoprolinase (ATP-hydrolysing)                                                |                                               |
| 3.02                  | 202530_at   | mitogen-activated protein kinase 14                                             |                                               |
| 3.01                  | 205896_at   | solute carrier family 22 (organic cation transporter), member 4                 |                                               |
| 3.01                  | 205403_at   | interleukin 1 receptor, type II                                                 | immunology                                    |

100 probe sets whose expression most reduced in trauma subjects

| <b>Fold change in trauma</b> | <b>Probe set</b> | <b>Gene description</b>                                                            | <b>Defined gene lists</b>                                                                    |
|------------------------------|------------------|------------------------------------------------------------------------------------|----------------------------------------------------------------------------------------------|
| 0.32                         | 221756_at        | LIM domain kinase 2                                                                | cell_cycle, cell_signaling, signal_transduction                                              |
| 0.32                         | 205006_s_at      | N-myristoyltransferase 2                                                           |                                                                                              |
| 0.32                         | 204070_at        | retinoic acid receptor responder (tazarotene induced) 3                            |                                                                                              |
| 0.32                         | 37145_at         | Granulysin                                                                         |                                                                                              |
| 0.32                         | 202742_s_at      | protein kinase, cAMP-dependent, catalytic, beta                                    | cell_cycle, cell_signaling, signal_transduction                                              |
| 0.32                         | 201665_x_at      | ribosomal protein S17                                                              |                                                                                              |
| 0.32                         | 201746_at        | tumor protein p53 (Li-Fraumeni syndrome)                                           | DNA_damage, gene_regulation, immunology, transcription, tsonc                                |
| 0.32                         | 212414_s_at      | septin 6                                                                           |                                                                                              |
| 0.31                         | 203485_at        | reticulon 1                                                                        | angiogenesis, metastasis                                                                     |
| 0.31                         | 209723_at        | serine (or cysteine) proteinase inhibitor, clade B (ovalbumin), member 9           |                                                                                              |
| 0.31                         | 205419_at        | Epstein-Barr virus induced gene 2 (lymphocyte-specific G protein-coupled receptor) |                                                                                              |
| 0.31                         | 200063_s_at      | nucleophosmin (nucleolar phosphoprotein B23, numatrin)                             | HG-Focus_HouseKeeping, HG-U133_Housekeeping, cell_cycle, cell_signaling, signal_transduction |
| 0.31                         | 216050_at        | CDNA: FLJ20931 fis, clone ADSE01282                                                |                                                                                              |
| 0.31                         | 203413_at        | NEL-like 2 (chicken)                                                               |                                                                                              |
| 0.31                         | 214705_at        | InaD-like protein                                                                  |                                                                                              |
| 0.31                         | 214042_s_at      | Similar to ribosomal protein L22 (LOC389175), mRNA                                 |                                                                                              |
| 0.30                         | 219423_x_at      | tumor necrosis factor receptor superfamily, member 25                              |                                                                                              |
| 0.30                         | 212070_at        | G protein-coupled receptor 56                                                      |                                                                                              |
| 0.30                         | 218638_s_at      | spondin 2, extracellular matrix protein                                            |                                                                                              |
| 0.30                         | 211623_s_at      | fibrillarin                                                                        | cell_cycle, cell_signaling, signal_transduction                                              |
| 0.29                         | 210538_s_at      | baculoviral IAP repeat-containing 3                                                |                                                                                              |
| 0.29                         | 213564_x_at      | lactate dehydrogenase B                                                            | misc                                                                                         |
| 0.29                         | 214280_x_at      | heterogeneous nuclear ribonucleoprotein A1                                         |                                                                                              |
| 0.29                         | 201030_x_at      | lactate dehydrogenase B                                                            | misc                                                                                         |
| 0.29                         | 213906_at        | v-myb myeloblastosis viral oncogene homolog (avian)-like 1                         | tsonc                                                                                        |
| 0.29                         | 214615_at        | purinergic receptor P2Y, G-protein coupled, 10                                     |                                                                                              |
| 0.29                         | 202741_at        | protein kinase, cAMP-dependent, catalytic, beta                                    | cell_cycle, cell_signaling, signal_transduction                                              |
| 0.29                         | 221726_at        | ribosomal protein L22                                                              |                                                                                              |
| 0.29                         | 217019_at        | ribosomal protein S4, X-linked                                                     | immunology                                                                                   |
| 0.29                         | 213687_s_at      | ribosomal protein L35a                                                             |                                                                                              |

| <b>Fold change in trauma</b> | <b>Probe set</b> | <b>Gene description</b>                                                | <b>Defined gene lists</b>                   |
|------------------------------|------------------|------------------------------------------------------------------------|---------------------------------------------|
| 0.28                         | 220940_at        | KIAA1641 protein                                                       |                                             |
| 0.28                         | 204198_s_at      | runt-related transcription factor 3                                    |                                             |
| 0.28                         | 205758_at        | CD8 antigen, alpha polypeptide (p32)                                   | angiogenesis, immunology, metastasis        |
| 0.28                         | 217807_s_at      | glioma tumor suppressor candidate region gene 2                        |                                             |
| 0.28                         | 205456_at        | CD3E antigen, epsilon polypeptide (TiT3 complex)                       | immunology                                  |
| 0.28                         | 212400_at        | hypothetical protein MGC50853                                          |                                             |
| 0.27                         | 210948_s_at      | lymphoid enhancer-binding factor 1                                     | development                                 |
| 0.27                         | 210606_x_at      | killer cell lectin-like receptor subfamily D, member 1                 | immunology                                  |
| 0.27                         | 209396_s_at      | chitinase 3-like 1 (cartilage glycoprotein-39)                         |                                             |
| 0.27                         | 219812_at        | stromal antigen 3                                                      |                                             |
| 0.27                         | 214321_at        | nephroblastoma overexpressed gene                                      | tsonc                                       |
| 0.26                         | 212827_at        | immunoglobulin heavy constant mu                                       |                                             |
| 0.26                         | 219777_at        | human immune associated nucleotide 2                                   |                                             |
| 0.26                         | 211991_s_at      | major histocompatibility complex, class II, DP alpha 1                 | immunology                                  |
| 0.26                         | 1405_i_at        | chemokine (C-C motif) ligand 5                                         |                                             |
| 0.26                         | 204891_s_at      | lymphocyte-specific protein tyrosine kinase                            | immunology, signal_transduction, tsonc      |
| 0.26                         | 208894_at        | major histocompatibility complex, class II, DR alpha                   | immunology                                  |
| 0.26                         | 204197_s_at      | runt-related transcription factor 3                                    |                                             |
| 0.26                         | 212706_at        | RAS p21 protein activator 4                                            |                                             |
| 0.25                         | 215342_s_at      | expressed in hematopoietic cells, heart, liver                         |                                             |
| 0.25                         | 204019_s_at      | SH3 domain containing, Ysc84-like 1 (S. cerevisiae)                    |                                             |
| 0.25                         | 208798_x_at      | golgin-67                                                              |                                             |
| 0.25                         | 217147_s_at      | T-cell receptor interacting molecule                                   |                                             |
| 0.25                         | 200061_s_at      | ribosomal protein S24                                                  | HG-Focus_HouseKeeping, HG-U133_Housekeeping |
| 0.25                         | 203828_s_at      | natural killer cell transcript 4                                       |                                             |
| 0.25                         | 211144_x_at      | T cell receptor gamma variable 9                                       |                                             |
| 0.25                         | 221234_s_at      | BTB and CNC homology 1, basic leucine zipper transcription factor 2    |                                             |
| 0.24                         | 210116_at        | SH2 domain protein 1A, Duncan's disease (lymphoproliferative syndrome) | immunology, signal_transduction             |
| 0.24                         | 200888_s_at      | ribosomal protein L23                                                  |                                             |
| 0.24                         | 210279_at        | G protein-coupled receptor 18                                          |                                             |
| 0.24                         | 209671_x_at      | T cell receptor alpha locus                                            |                                             |
| 0.24                         | 210972_x_at      | CDNA clone MGC:71411 IMAGE:4853814, complete cds                       |                                             |
| 0.23                         | 211990_at        | major histocompatibility complex, class II, DP alpha 1                 | immunology                                  |
| 0.23                         | 216191_s_at      | T cell receptor delta locus                                            |                                             |
| 0.23                         | 209670_at        | CDNA clone MGC:71411 IMAGE:4853814, complete cds                       |                                             |
| 0.23                         | 214617_at        | perforin 1 (pore forming protein)                                      | immunology                                  |
| 0.23                         | 204655_at        | chemokine (C-C motif) ligand 5                                         |                                             |

| <b>Fold change in trauma</b> | <b>Probe set</b> | <b>Gene description</b>                                                      | <b>Defined gene lists</b>                        |
|------------------------------|------------------|------------------------------------------------------------------------------|--------------------------------------------------|
| 0.23                         | 205831_at        | CD2 antigen (p50), sheep red blood cell receptor                             | angiogenesis, immunology, metastasis             |
| 0.23                         | 221601_s_at      | regulator of Fas-induced apoptosis                                           |                                                  |
| 0.22                         | 219093_at        | hypothetical protein FLJ20701                                                |                                                  |
| 0.22                         | 202207_at        | ADP-ribosylation factor-like 7                                               |                                                  |
| 0.22                         | 206785_s_at      | killer cell lectin-like receptor subfamily C, member 1                       |                                                  |
| 0.22                         | 213539_at        | CD3D antigen, delta polypeptide (TiT3 complex)                               |                                                  |
| 0.21                         | 221558_s_at      | lymphoid enhancer-binding factor 1                                           | development                                      |
| 0.21                         | 213193_x_at      | T cell receptor beta chain BV20S1 BJ1-5 BC1 mRNA, complete cds               |                                                  |
| 0.21                         | 211902_x_at      |                                                                              |                                                  |
| 0.21                         | 219528_s_at      | B-cell CLL/lymphoma 11B (zinc finger protein)                                |                                                  |
| 0.20                         | 215806_x_at      | T cell receptor gamma variable 9                                             |                                                  |
| 0.20                         | 209813_x_at      | T cell receptor gamma variable 9                                             |                                                  |
| 0.20                         | 206337_at        | chemokine (C-C motif) receptor 7                                             | immunology                                       |
| 0.20                         | 201406_at        | ribosomal protein L36a-like                                                  |                                                  |
| 0.20                         | 203386_at        | TBC1 domain family, member 4                                                 |                                                  |
| 0.19                         | 215524_x_at      | Human TCRAV14.1a mRNA for T-cell receptor alpha-chain V region, partial cds. |                                                  |
| 0.19                         | 210915_x_at      | T cell receptor beta chain BV20S1 BJ1-5 BC1 mRNA, complete cds               |                                                  |
| 0.19                         | 205291_at        | interleukin 2 receptor, beta                                                 | immunology                                       |
| 0.19                         | 216920_s_at      | T cell receptor gamma variable 9                                             |                                                  |
| 0.19                         | 221011_s_at      | likely ortholog of mouse limb-bud and heart gene                             |                                                  |
| 0.19                         | 202746_at        | integral membrane protein 2A                                                 |                                                  |
| 0.19                         | 205495_s_at      | Granulysin                                                                   |                                                  |
| 0.19                         | 205821_at        | killer cell lectin-like receptor subfamily K, member 1                       |                                                  |
| 0.18                         | 217143_s_at      | T cell receptor delta locus                                                  |                                                  |
| 0.18                         | 201137_s_at      | major histocompatibility complex, class II, DP beta 1                        | immunology                                       |
| 0.17                         | 211796_s_at      | T cell receptor beta chain BV20S1 BJ1-5 BC1 mRNA, complete cds               |                                                  |
| 0.17                         | 202524_s_at      | sparc/osteonectin, cwcv and kazal-like domains proteoglycan (testican) 2     |                                                  |
| 0.17                         | 205798_at        | interleukin 7 receptor                                                       | immunology                                       |
| 0.16                         | 205590_at        | RAS guanyl releasing protein 1 (calcium and DAG-regulated)                   |                                                  |
| 0.16                         | 220646_s_at      | killer cell lectin-like receptor subfamily F, member 1                       |                                                  |
| 0.16                         | 209602_s_at      | GATA binding protein 3                                                       | gene_regulation, immunology, misc, transcription |
| 0.14                         | 212671_s_at      | major histocompatibility complex, class II, DQ alpha 1                       | immunology                                       |
| 0.14                         | 214470_at        | killer cell lectin-like receptor subfamily B, member 1                       |                                                  |

| <b>Fold change in trauma</b> | <b>Probe set</b> | <b>Gene description</b>                                                      | <b>Defined gene lists</b> |
|------------------------------|------------------|------------------------------------------------------------------------------|---------------------------|
| 0.14                         | 205488_at        | granzyme A (granzyme 1, cytotoxic T-lymphocyte-associated serine esterase 3) | immunology, misc          |
